# Supplementary material for: Metabolite Changes of Perna canaliculus Following a Laboratory Marine Heatwave Exposure: Insights from Metabolomic Analyses
Source: MDPI journal article supplement (doi:10.3390/metabo13070815), 2023-07-03
Supplement: s1 [file s1]

## Supplementary material

**Supplementary Table S1:** Metabolomics findings of *Perna canaliculus* haemolymph metabolites with an interaction effect between temperature and time. Compounds are listed in alphabetical order with a p-value, a Kyoto Encyclopaedia of Genes and Genomes (KEGG) identification number and metabolite class grouping visible in the table.

| Metabolite                         | p-value  | KEGG ID       | Metabolite class                              |
|------------------------------------|----------|---------------|-----------------------------------------------|
| 2-Deoxyadenosine 5-diphosphate     | 4.48E-05 | C00206        | Purine nucleotides                            |
| 2-Deoxycytidine                    | 2.86E-03 | C00881        | Pyrimidine nucleosides                        |
| 2-Deoxycytidine 5-diphosphate      | 1.73E-08 | C00705        | Organic oxoanionic compounds                  |
| 2-Deoxy-D-ribose                   | 1.80E-03 | Not Available | Organooxygen compounds                        |
| 2-Deoxyguanosine 5-diphosphate     | 1.40E-05 | C00361        | Cinnamic acids and derivatives                |
| 2-Deoxyguanosine 5-monophosphate   | 3.23E-04 | C00362        | Purine nucleotides                            |
| 2-Deoxyuridine                     | 8.08E-07 | C00526        | Pyrimidine nucleosides                        |
| 2-Methyl-1-butanol                 | 4.48E-05 | Not Available | Organooxygen compounds                        |
| 3-Methylglutaric acid              | 6.17E-03 | Not Available | Fatty Acyls                                   |
| 4-Methyl-2-oxovaleric acid         | 2.24E-08 | Not Available | Keto acids and derivatives                    |
| 5-Hydroxy-3-indoleacetic acid      | 6.17E-03 | C05635        | Indoles and derivatives                       |
| Adenosine 3-5-cyclic monophosphate | 4.48E-05 | C00575        | Purine nucleotides                            |
| Adenosine 5-diphosphate            | 1.73E-04 | C00008        | Purine nucleotides                            |
| Adenosine 5-monophosphate          | 1.37E-04 | C00020        | Purine nucleotides                            |
| Adenylosuccinic acid               | 3.31E-03 | Not Available | Purine nucleotides                            |
| AICAR                              | 7.38E-04 | C04677        | Imidazole ribonucleosides and ribonucleotides |
| alpha-D-Glucose-1-phosphate        | 1.80E-06 | C00103        | Organooxygen compounds                        |
| alpha-Ketoglutaric acid            | 7.91E-11 | C00026        | Keto acids and derivatives                    |
| Arabinose-5-phosphate              | 3.31E-03 | C01112        | Organooxygen compounds                        |
| beta-Nicotinamide mononucleotide   | 7.78E-06 | C00455        | Pyridine nucleotides                          |
| Cellobiose                         | 2.23E-06 | C06422        | Organooxygen compounds                        |
| cis-Aconitic acid                  | 8.47E-05 | C00417        | Carboxylic acids and derivatives              |
| Cytidine                           | 8.80E-03 | C00475        | Pyrimidine nucleosides                        |
| Cytidine-5-monophosphate           | 2.00E-04 | C00055        | Pyrimidine nucleotides                        |
| Cytosine                           | 4.27E-04 | C00380        | Diazines                                      |
| D-+-Galactosamine                  | 2.02E-04 | Not Available | Organooxygen compounds                        |
| Deoxythymidine 5-triphosphate      | 3.31E-03 | C00459        | Pyrimidine nucleotides                        |
| D-Fructose 1-6-biphosphate         | 4.48E-05 | C05378        | Organooxygen compounds                        |
| D-pantothenic acid                 | 3.31E-03 | C00864        | Organooxygen compounds                        |
| D-Xylulose-5-phosphate             | 1.73E-04 | C00231        | Organooxygen compounds                        |
| gamma-Aminobutyric acid            | 7.78E-06 | C00334        | Carboxylic acids and derivatives              |
| Glyceric acid                      | 6.17E-03 | C00258        | Organooxygen compounds                        |
| Guanosine                          | 4.48E-05 | C00387        | Purine nucleosides                            |
| Inosine                            | 6.17E-03 | C00294        | Purine nucleosides                            |
| Inosine 5-diphosphate              | 8.47E-05 | C00104        | Purine nucleotides                            |
| Isopentyl acetate                  | 2.23E-06 | C12296        | Carboxylic acids and derivatives              |
| Itaconic acid                      | 1.98E-08 | C00490        | Fatty Acyls                                   |
| Lactic acid                        | 1.54E-07 | C00186        | Hydroxy acids and derivatives                 |

|                               |          |               |                                          |
|-------------------------------|----------|---------------|------------------------------------------|
| L-Arabinose                   | 7.78E-06 | C02479        | Organooxygen compounds                   |
| L-Citrulline                  | 6.79E-04 | C00327        | Carboxylic acids and derivatives         |
| L-Dihydroorotic acid          | 6.20E-06 | C00337        | Carboxylic acids and derivatives         |
| L-Gluthathione (oxidized)     | 3.80E-06 | C00051        | Carboxylic acids and derivatives         |
| L-Malic acid                  | 2.67E-03 | C00149        | Hydroxy acids and derivatives            |
| L-Methionine                  | 8.08E-07 | C00073        | Carboxylic acids and derivatives         |
| L-Phenylalanine               | 3.31E-03 | C00079        | Carboxylic acids and derivatives         |
| L-Tryptophan                  | 3.31E-03 | C00078        | Indoles and derivatives                  |
| Maleic acid                   | 1.78E-04 | C01384        | Carboxylic acids and derivatives         |
| Mevalonic acid 5-phosphate    | 1.76E-03 | C01107        | Organic phosphoric acids and derivatives |
| m-Hydroxybenzoic acid         | 3.31E-03 | C00587        | Benzene and substituted derivatives      |
| N-Acetylglutamic acid         | 4.41E-05 | C00624        | Carboxylic acids and derivatives         |
| Nicotinic acid                | 1.18E-04 | C00253        | Pyridines and derivatives                |
| Nicotinic acid mononucleotide | 3.31E-03 | C01185        | Pyridine nucleotides                     |
| o-Hydroxy hippuric acid       | 5.47E-04 | Not Available | Benzene and substituted derivatives      |
| Riboflavin                    | 1.30E-03 | C00255        | Pteridines and derivatives               |
| Shikimic acid                 | 1.73E-04 | C00493        | Organooxygen compounds                   |
| Succinic acid                 | 6.08E-04 | C00042        | Carboxylic acids and derivatives         |
| Succinic semialdehyde         | 6.92E-10 | C00232        | Fatty Acyls                              |
| Taurine                       | 8.80E-03 | C00245        | Organic sulfonic acids and derivatives   |
| trans-Aconitic acid           | 3.31E-03 | C02341        | Carboxylic acids and derivatives         |
| Uridine 5-diphosphate         | 4.48E-05 | C00015        | Pyrimidine nucleotides                   |
| Xylitol                       | 8.80E-03 | C00379        | Organooxygen compounds                   |
